# Organization Section

The following were elected to the Professional Section as of September 1990:

Armando G. Amador, Springfield, IL  
Ellen M. Anderson, Dover-Foxcroft, ME  
Loutinsa S. Anderson, Baltimore, MD  
Mary Barna, DPM, River Rouge, MI  
Bud Bednarski, Van Nuys, CA  
Joel Betesh, MD, Philadelphia, PA  
Robert M. Blumm, Amityville, NY  
Patricia M. Butler, Ann Arbor, MI  
Robert P. Castellucci, MD, Richmond, VA  
Julie Christini, Muncie, IN  
Carol Clewans, MD, Palo Alto, CA  
Glynne C. Couvillion, MD, Santa Barbara, CA  
Peter Damsbo, Naerum, Denmark  
Victor Rico David, MD, PhD, Chihuahua, Mexico  
A. Dejgard, Bagsvaerd, Denmark  
Lancaster Carlton Delk, Dalton, GA  
Patricia Dittman, Ft. Lauderdale, FL  
Jodie A. Ferguson, Nitro, WV  
Rita Fishman, New York, NY  
Bryann P. Friedmann, Randolph, NJ  
Kathy Garlick, Chicago, CA  
Susan W. Goodrich, Tampa, FL  
Sheila K. Gunn, Houston, TX  
Howard Lichtenstein, MD, Fresno, CA  
Rebecca B. Lipton, Elmhurst, IL  
David Lo, La Jolla, CA  
Helene Marcovici, MS, RD, Hicksville, NY  
Veronica Marer, MD, Woodbridge, CT  
Russell Margolis, Eugene, OR  
Judy W. Martin, Daytona Beach, FL  
Maureen McGuire, Long Beach, CA  
M. Molly McMahon, Rochester, MN  
Debbie G. Moore, Raleigh, NC  
Patricia Myers, RN, Adrian, MI  
Lee Pearlman, DPM, Columbus, OH  
Krishna M. Pinnamaneni, MD, Tempe, AZ  
Michael J. Quon, MD, PhD, North Potomac, MD

Betty Roberts, RN, CDE, Meridian, MS  
Arnold I. Roth, MD, Rancho Cucamonga, CA  
Karen R.M. Russell, Mona Kingston, West Indies  
Christine R. Schneyer, MD, Baltimore, MD  
Mary T. Self, Bowling Green, KY  
Imam Seyyed-Zea, Fremont, CA  
Paul M. Shoenfeld, Roanoke, VA  
Catherine C. Soderquist, Madison, WI  
Natalie Steavpack, Green Bay, WI  
Anne Thorburn, Parkville, Victoria, Australia  
Foxhall P. Thornton, Jr., MD, Concordia, KS  
Theola A. Thulean, Peoria, IL  
Lisa A. Untrauer, Kunia, HI  
Susan K. Vigrass, Stow, OH  
Charlotte Weaver, Elkhart, IN  
J. Martin Wehlou, Gentbrugge, Belgium  
Cheryl Weiner, DPM, Columbus, OH  
James W. Wright, Lynchburg, VA  
Margaret N. Zehalla, Cromwell, CT  
Michele M. Zerah, Southampton, NY

## ADA EVENTS

### FUTURE MEETINGS

51st Annual Meeting: 21–28 June 1991, Washington Convention Center, Washington, DC.  
52nd Annual Meeting: 18–23 June 1992, San Antonio, TX.

### CLINICAL EDUCATION PROGRAM (CEP)

Funded by an educational grant from The Upjohn Company, ADA's new Clinical Education Program (CEP) "Managing Diabetes in the 1990s" focuses on helping physicians gain a

better understanding of how to manage the diabetic patient, including treatments that may delay or avoid diabetic complications. The 3.5-hour seminars are specifically designed for primary-care physicians. Attendees will receive Continuing Medical Education credits. ADA affiliates will conduct approximately 100 CEP seminars during the coming year. The following CEP programs have been scheduled.

Nevada Affiliate—5 February 1991, Lake Tahoe.  
 Pennsylvania Affiliate—12 April 1991, White Haven.  
 Virginia Affiliate—15 April 1991, Roanoke.

For more information, contact your local ADA affiliate or Dr. Michael Stolar, Vice President, Scientific Affairs, ADA National Center, 1660 Duke Street, Alexandria, VA 22314. Tel.: (703) 549-1500, ext. 360; or 1-800-232-3472, ext. 360.

### **DIABETES: SPRINTING INTO THE 90s**

The ADA Northern Illinois Affiliate and the Diabetes Educators of the Chicago Area are cosponsoring "Diabetes: Sprinting into the 90s" 12 April 1991 at the Marriot Hotel in Oakbrook, Illinois. Marion Franz, RD, will be among the guest speakers. Topics will include fuel metabolism of exercise, exercise and diabetes, and exercise and the feet. For further information, contact Marilyn Caras, ADA Northern Illinois Affiliate, 6 N. Michigan Avenue, Suite 1202, Chicago, IL 60602. Tel.: (312) 346-1805.

### **DIABETES UPDATE SYMPOSIUM**

The ADA Washington, DC Affiliate is sponsoring "Diabetes Update 1991" 20 April 1991 at the Lipsett Auditorium, Clinical Center, National Institutes of Health, Bethesda, Maryland. The speakers include Dr. N. Maclaren, Dr. M. Tuck, Dr. M. Pfeiffer, Dr. J. Halter, Dr. T. Wadden, and Dr. M.C. Riddle. For more information, contact Derek LeRoith, MD, PhD, Diabetes Branch, NIDDK, NIH, Building 10, Room 8S243, 9000 Rockville Pike, Bethesda, MD. Fax: (301) 480-4386.

### **ADA COUNCIL ON YOUTH JOINT SYMPOSIUM**

The International Study Group of Diabetes in Children and Adolescents will hold its 17th annual meeting jointly with the ADA Council on Youth, 19–22 June 1991 in Williamsburg, Virginia. This satellite symposium of the IDF Congress is entitled "New Developments in the Etiology and Treatment of Childhood Diabetes" and will focus on immunogenetics, pre-diabetes, and long-term complications. The deadline for registration and abstracts is 15 January 1991. For more information, contact William L. Clarke, MD, Box 386, Department of Pediatrics, University of Virginia Health Sciences Center, Charlottesville, VA 22980. Fax: (804) 924-2769.

### **BEHAVIORAL ASPECTS OF DIABETES MELLITUS**

ADA's new Council on Behavioral Medicine and Psychology and the Education Council are cosponsoring a satellite meeting entitled "Behavioral Aspects of Diabetes Mellitus" on 20–22 June 1991 at the Fort Magruder Inn in Williamsburg, Virginia. Topics will include the impact of diabetes on neuropsychological functioning and psychiatric problems, approaches to weight management, the treatment of diabetic patients with

eating disorders, and principles of education. For more information, contact Alan M. Jacobson, MD, Joslin Diabetes Center, One Joslin Place, Boston, MA 02215. Tel.: (617) 732-2594; or Linda Siminerio, RN, MS, Tel.: (412) 692-5254.

## **OTHER EVENTS**

### **14TH IDF CONGRESS**

The International Diabetes Federation will hold its 14th Congress, 23–28 June 1991, at the Washington Convention Center in Washington, DC. The program will include scientific and clinical sessions covering such topics as clinical care, health-care delivery, education, public awareness, fund raising and volunteerism, association management, government and association relations, and youth services. Preliminary registration forms are available. For more information, write to Linda Cann, American Diabetes Association, 1660 Duke Street, Alexandria, VA 22314. Tel.: (703) 549-1500, ext. 281; or 1-800-232-3472, ext. 281.

### **MACROVASCULAR COMPLICATIONS OF DIABETES MELLITUS**

A Satellite Symposium entitled "Macrovascular Complications of Diabetes Mellitus" will be held 20–22 June 1991 in Charleston, South Carolina. Registration deadline is 28 February 1991. For further information, contact Dr. Maria Lopes-Virella, Veterans Administration Medical Center, Research Services, 109 Bee Street, Charleston, SC 29403. Tel.: (803) 577-5011, ext. 7542.

### **INTERNATIONAL STUDY GROUP ON DIABETES IN CHILDREN AND ADOLESCENTS**

The International Study Group on Diabetes, the University of Verona, and the Beilinson Medical Center at the University of Tel Aviv, Israel, are cosponsoring "Update on Diabetes in Childhood" 16–23 March 1991, in Passo del Tonale (Trento), Italy. This course is designed for physicians who wish to expand their knowledge of diabetes in the young. For more information, contact Leonardo Pinelli, Servizio di Diabetologia Pediatrica, Policlinico, I-37134, Verona, Italy. Tel.: 39-45-933667.

### **5TH MILANO INTERNATIONAL MEETING ON DIABETES**

The Scientific Institute of the San Raffaele Hospital is announcing the "Fifth Milano International Meeting on Diabetes" to be held 21–23 March 1991 in Milano, Italy. Among the topics to be discussed are glucose transporter and insulin action, diabetic nephropathy, genetic epidemiology, lipoprotein, and immunology of diabetes. For more information, contact Piero Micossi, MD, Istituto Scientifico H San Raffaele, Via Olgettina 60, 20132 Milano, Italy. Tel.: 39-02-21702759; or Fax: 39-02-21702752.

### **CONGRESS ON FRUCTOSE AND FRUCTOSE-CONTAINING FOODS**

The International Congress on Fructose and Fructose-Containing Foods: Nutritional and Metabolic Aspects—Economic

Considerations will be held 21–23 March 1991 in Paris, France. This event is under the patronage of the European Association for the Study of Diabetes. For more information, contact Convergences-Fructose, 120, Avenue Gambetta, F-75020 Paris, France. Telex: 216 911 F; or Fax: (33) (1) 40310165.

### **NUTRITION AND DIABETES MELLITUS: FOCUS FOR THE 1990s**

The ADA's Council on Nutritional Science and Metabolism (CONSAM) is sponsoring "Nutrition and Diabetes Mellitus: Focus for the 1990s" 22–23 June 1991 in Baltimore, Maryland, at the Hyatt Regency-Inner Harbor. Among the topics to be discussed are macronutrient composition and caloric dilution, as well as the emergence of diabetes and changes in diet in developing countries. For more information, contact Liz DeShelter, RD, Diabetes Care Center, Riverside Methodist Hospitals, 3535 Olentangy River Road, Columbus, OH 43214. Tel.: (614) 261-5096.

### **INTERNATIONAL SYMPOSIUM ON DIABETES AND ATHEROSCLEROSIS**

The Royal College of Physicians of Ireland will present "Diabetes and Atherosclerosis" 8–10 September 1991 at Trinity College in Dublin, Ireland. The symposium will feature keynote speeches from internationally recognized researchers. For more information, contact Prof. Gerald H. Tomkin, MD, Director of Education, Royal College of Physicians in Ireland, Kildare Street, Dublin 2, Ireland, United Kingdom.

---

## **ADA GRANTS AND AWARDS**

---

### **FEASIBILITY GRANTS**

These grants provide up to \$40,000/yr for 2 yr for new and innovative diabetes research. The funds are to be used for equipment, supplies, and salary for technical assistance. Established diabetes investigators must propose marked departures from current research. Investigators in other fields are encouraged to apply their expertise to diabetes research. Applicants must be U.S. citizens or permanent residents and be members of U.S. university-affiliated institutions or equivalent within the U.S. or U.S. possessions. Application

deadline is 1 February 1991 for funding beginning 1 July 1991.

### **RESEARCH AND DEVELOPMENT AWARDS**

These awards provide a maximum of \$65,000/yr for 3 yr to support young investigators with 2–5 yr of postdoctoral research experience. The funds support an investigator's salary and research program and enable the investigator to initiate an independent research effort that will lead to future long-term research funding. Applicants must be U.S. citizens or permanent residents and hold independent faculty positions at U.S. university-affiliated institutions within the U.S. and U.S. possessions. Application deadline is 1 February 1991 for funding beginning 1 July 1991.

### **LIONS CLUB INTERNATIONAL CLINICAL RESEARCH PROGRAM IN DIABETIC EYE DISEASE**

This program supports clinical or applied research in diabetic retinopathy in the U.S. and abroad. Awards up to \$40,000/yr for 2 yr will be given to support new treatment regimens, epidemiology, and translation research. In addition, funds will be provided to support the training of foreign investigators in U.S. research institutions, to enable U.S. investigators to conduct training programs in foreign institutions, and to provide equipment for clinical research in diabetic retinopathy. Application deadline is 1 February 1991 for 1 July 1991 funding.

### **CLINICAL RESEARCH GRANT PROGRAM**

Grants of up to \$50,000/yr are provided for 3 yr for studies that directly involve humans. In vitro research on human blood or tissue samples to measure effects of environmentally induced (e.g., diet, drugs) changes qualifies as clinical research under this program; simply using human tissues for laboratory research does not qualify. The funds may be used for equipment, supplies, and/or salary (excluding principal investigator's salary). Applicants must be U.S. citizens or permanent residents and hold faculty-level appointments at U.S. university-affiliated institutions. Application deadline is 1 February 1991 for 1 July 1991 funding. Application forms for all programs are available from the American Diabetes Association National Center, Division of Scientific and Medical Affairs, 1660 Duke Street, Alexandria, VA 22314. Tel.: (703) 549-1500; or 1-800-232-3472.
